# Supplementary material for: Brief communication: Weak control of snow avalanche deposit volumes by paths morphological characteristics
Source: Copernicus journal article supplement (doi:10.5194/tc-2021-103), 2021-04-15
Supplement: Supplementary file 1 [file tc-2021-103-supplement.pdf]

## Supplements

**Supplementary table 1: Descriptive statistics of quantitative morphological characteristics of avalanche paths.**

| Variable                    | Mean | Std. deviation | Range     |
|-----------------------------|------|----------------|-----------|
| Length (m)                  | 1515 | 615            | 594-2860  |
| Minimal elevation (m a.s.l) | 1781 | 123            | 1461-2313 |
| Maximal elevation (m a.s.l) | 2731 | 397            | 2120-3731 |
| Mean elevation (m a.s.l)    | 2281 | 260            | 1936-2942 |
| Vertical drop (m)           | 950  | 395            | 331-1887  |
| Area minimal slope (°)      | 3    | 4              | 0-15      |
| Area maximal slope (°)      | 82   | 81             | 39-89     |
| Area mean slope (°)         | 39   | 7              | 26-49     |
| Surface area (ha)           | 36   | 39             | 3-172     |

**Supplementary Table 2: Pearson correlation  $\rho$  between the morphological descriptors and orientations of the set of analyzed avalanche paths. Values in bold are significant at the 0.05 level.**

|                | Min elevation | Mean elevation | Min slope    | Max slope    | Mean slope  | Surface area | N-W          | N        | N-E      | E        | S-E      | S            | S-W      | W            |
|----------------|---------------|----------------|--------------|--------------|-------------|--------------|--------------|----------|----------|----------|----------|--------------|----------|--------------|
| Min elevation  | <b>1</b>      | <b>0.26</b>    | -0.09        | 0.10         | 0.14        | -0.09        | <b>0.25</b>  | -0.04    |          | -0.03    | 0.01     | -0.19        | -0.01    | -0.03        |
| Mean elevation | <b>0.26</b>   | <b>1</b>       | <b>-0.42</b> | <b>0.38</b>  | 0.06        | <b>0.74</b>  | -0.04        | 0.03     |          | -0.01    | 0.02     | 0.14         | -0.08    | -0.12        |
| Min slope      | -0.09         | <b>-0.42</b>   | <b>1</b>     | <b>-0.48</b> | 0.07        | <b>-0.41</b> | 0.08         | 0.17     |          | -0.19    | -0.22    | 0.16         | -0.01    | -0.14        |
| Max slope      | 0.01          | <b>0.38</b>    | <b>-0.48</b> | <b>1</b>     | <b>0.49</b> | <b>0.28</b>  | 0.06         | -0.08    |          | 0.21     | -0.16    | -0.18        | 0.03     | 0.21         |
| Mean slope     | 0.14          | 0.06           | 0.07         | <b>0.49</b>  | <b>1</b>    | -0.19        | <b>0.26</b>  | -0.03    |          | -0.15    | -0.22    | -0.12        | -0.03    | 0.18         |
| Surface area   | -0.01         | <b>0.74</b>    | <b>-0.41</b> | <b>0.28</b>  | -0.19       | <b>1</b>     | -0.22        | 0.05     |          | 0.10     | 0.09     | 0.10         | 0.07     | -0.11        |
| N-W            | <b>0.25</b>   | -0.04          | 0.08         | 0.06         | <b>0.26</b> | -0.22        | <b>1</b>     | -0.18    |          | -0.17    | -0.20    | <b>-0.43</b> | -0.17    | -0.21        |
| N              | -0.04         | 0.03           | 0.17         | -0.07        | -0.03       | 0.05         | -0.18        | <b>1</b> |          | -0.07    | -0.09    | -0.20        | -0.08    | -0.10        |
| N-E            |               |                |              |              |             |              |              |          | <b>1</b> |          |          |              |          |              |
| E              | -0.03         | -0.01          | -0.19        | 0.21         | -0.15       | 0.10         | -0.17        | -0.08    |          | <b>1</b> | -0.08    | -0.18        | -0.07    | -0.10        |
| S-E            | 0.01          | 0.02           | -0.22        | -0.16        | -0.21       | 0.09         | -0.20        | -0.09    |          | -0.08    | <b>1</b> | -0.21        | -0.08    | -0.11        |
| S              | -0.19         | 0.14           | 0.16         | -0.18        | -0.12       | 0.10         | <b>-0.43</b> | -0.20    |          | -0.18    | -0.21    | <b>1</b>     | -0.18    | <b>-0.23</b> |
| S-W            | -0.01         | -0.07          | -0.01        | 0.03         | -0.03       | 0.07         | -0.17        | -0.07    |          | -0.07    | -0.08    | -0.18        | <b>1</b> | -0.10        |
| W              | -0.03         | -0.12          | -0.14        | 0.21         | 0.18        | -0.11        | -0.21        | -0.10    |          | -0.10    | -0.11    | <b>-0.23</b> | -0.10    | <b>1</b>     |

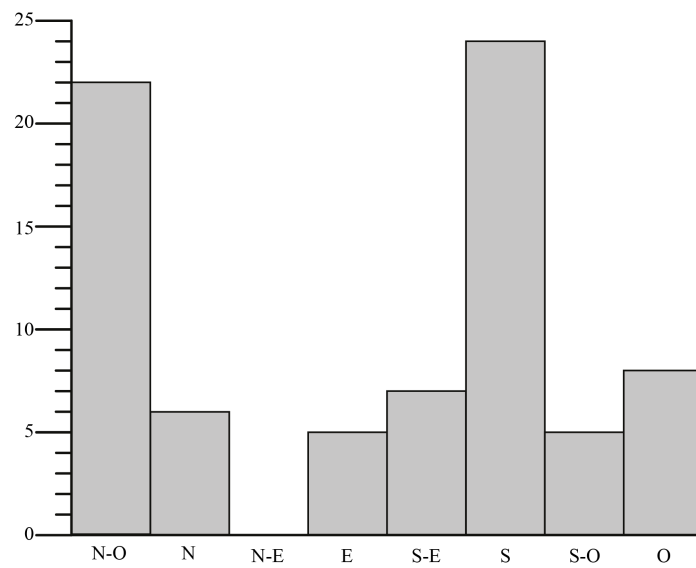

**Supplementary figure 1: Number of paths by orientation**

**Supplementary Table 3:  $R^2$  statistics for the fitted neural network models. For each series (annual, winter and spring) and model type (3 or 8 layers) the table provides the median (50%), 80% and 97.5% percentiles over the distribution of the 100 bootstrap iterations.**

|        | 3 layers |      |       | 8 layers |      |       |
|--------|----------|------|-------|----------|------|-------|
|        | 50%      | 80%  | 97,5% | 50%      | 80%  | 97,5% |
| Annual | 0.18     | 0.32 | 0.46  | 0.28     | 0.43 | 0.57  |
| Winter | 0.29     | 0.45 | 0.57  | 0.33     | 0.56 | 0.76  |
| Spring | 0.06     | 0.21 | 0.37  | 0.10     | 0.30 | 0.54  |

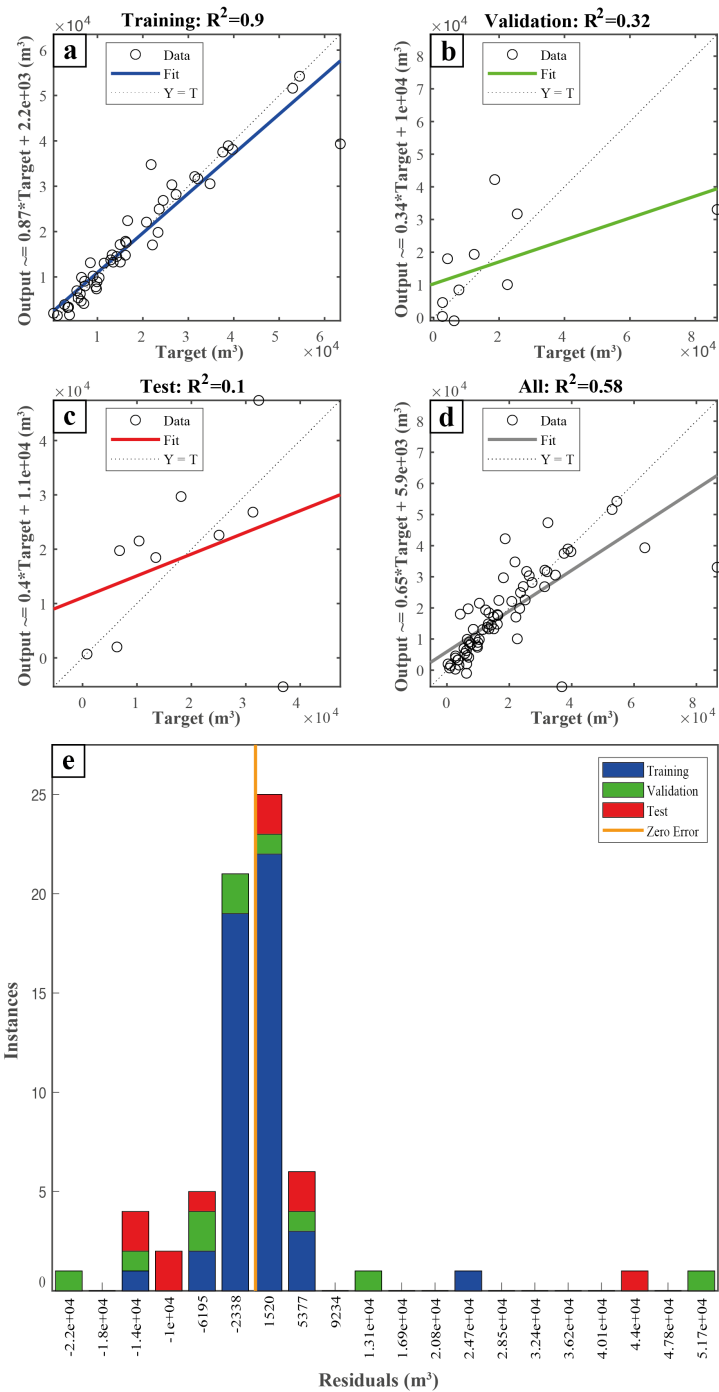

**Supplementary Figure 2: Example of one (among the 100 bootstrap iterations) fitted 8-layer neural network annual model. Linear correlation between observed and predicted values for: (a) training sample, (b) validation sample, (c) test sample, (d) full sample, (e) histogram of residuals for the training, validation and test samples.**
